# Supplementary material for: Myoglobin diet affected the colonic mucus layer and barrier by increasing the abundance of several beneficial gut bacteria
Source: Royal Society of Chemistry journal article supplement (doi:10.1039/d2fo01799g), 2022-01-01
Supplement: d2fo01799g1.pdf [file d2fo01799g1.pdf]

1 **Moderate intake of myoglobin ameliorated intestinal barrier**  
2 **by increasing the abundance of several beneficial gut bacteria**

3 Shuai Jiang, Dejiang Xue, Miao Zhang, Qian Li, Hui Liu, Di Zhao, Guanghong Zhou,

4 Chunbao Li\*

5 Key Laboratory of Meat Processing and Quality Control, MOE; Key Laboratory of

6 Meat Processing, MARA; Jiangsu Collaborative Innovation Center of Meat Production,

7 Processing and Quality Control; College of Food Science and Technology, Nanjing

8 Agricultural University, Weigang 1#, 210095, Nanjing, P.R. China

9

10 \*Corresponding author: Dr. Chunbao Li

11 E-mail: [chunbao.li@njau.edu.cn](mailto:chunbao.li@njau.edu.cn)

12 Address: College of Food Science and Technology, Nanjing Agricultural University,

13 Weigang 1#, 210095, Nanjing

**Table S1** Primer sequences used in RT-qPCR assays in colonic tissue

| Target genes   | Primer Sequence (5'-3')                                |
|----------------|--------------------------------------------------------|
| TNF- $\alpha$  | FW: TGCTTTCTGTGCTCATGGTG<br>RV: GACTAGCCAGGAGGGAGAAC   |
| IL-6           | ACTTCACAAGTCCGGAGAGG<br>RV: TGCAAGTGCATCATCGTTGT       |
| IL-1 $\beta$   | ACTCATTGTGGCTGTGGAGA<br>RV: AGCCTGTAGTGCAGTTGTCT       |
| ZO-1           | FW: TGTTTATGCGGACGGTGGCG<br>RV: TCCATTGCTGTGCTCTTAGCGG |
| Occcludin      | FW: GCGGAAAGAGTTGACAGTCC<br>RV: TGCCTGAAGTCATCCACACT   |
| Claudin 1      | FW: ACGGTCTTTGCACTTTGGTC<br>RV: GGGAGAGGAGAAGCACAGTT   |
| MUC1           | FW: TGCCCTTCCAAGTGAGGAAA<br>RV: CTGGAGTGGTAGTCGATGCT   |
| MUC2           | FW: TTTGGGTCCTGTGGGACTTT<br>RV: ACTGGTCTTCTCCTCCTTGC   |
| $\beta$ -actin | FW: GAGAAGCTGTGCTATGTTGCT<br>RV: CTCCAGGGAGGAAGAGGATG  |

**Table S2** Synchronous fluorescence spectra of Tyr and Trp residues

| Group | Sample Name | Tryptophan<br>$\lambda_{\max}$ (nm) | Tyrosine<br>$\lambda_{\max}$ (nm) |
|-------|-------------|-------------------------------------|-----------------------------------|
| G     | CON         | 343                                 | 307                               |
|       | LMb         | 342                                 | 307                               |
|       | MMb         | 342                                 | 306                               |
|       | HMb         | 341                                 | 305                               |
| I1    | CON         | 348                                 | 305                               |
|       | LMb         | 348                                 | 305                               |
|       | MMb         | 348                                 | 305                               |
|       | HMb         | 348                                 | 305                               |
| I2    | CON         | 348                                 | 305                               |
|       | LMb         | 348                                 | 305                               |
|       | MMb         | 348                                 | 305                               |
|       | HMb         | 348                                 | 305                               |

17 Notes: G, Gastric digestion for 2 h; I1, intestinal digestion for 1 h; I2, intestinal

18 digestion for 2 h

## 19 **2. Materials and methods**

### 20 **2.3 In vitro digestion of diets**

21 Each diet (1.43 g) was mixed in 3.57 mL distilled water and then incubated for 1 h at  
22 37 °C until the protein was fully swelled. Then, 4 mL simulated salivary fluid (SSF)  
23 solution, 0.857 mL  $\alpha$ -amylase (250 mg/mL), 0.025 mL CaCl<sub>2</sub> solution (0.3 M), 0.118  
24 mL distilled water were mixed with the sample. The pH of the mixtures was adjusted  
25 to 6.8 and continuously stirred in an incubation shaker at 200 rpm at 37 °C for 2 min.

26 For gastric digestion, 0.8 mL pepsin solution (5 mg/mL, pH 3), 0.005 mL CaCl<sub>2</sub>  
27 solution (0.3 M), 1.195 mL distilled water and 8 mL simulated gastric fluid (SGF)  
28 solution were added to each sample and the pH was adjusted to 3.0. The mixtures were  
29 continuously stirred in an incubation shaker at 200 rpm and 37 °C for 2 h.

30 For the intestinal phase, the samples digested by pepsin were removed from 37 °C and  
31 the pH was immediately adjusted to 7.0 (gastric digestion, G). Then, 1 mL of pancreatin  
32 solution (4 mg/mL), 0.04 mL of CaCl<sub>2</sub> solution (0.3 M), 2.96 mL of distilled water and  
33 16 mL of simulated intestinal fluid (SIF) solution were added, and the mixture was  
34 adjusted to pH 7.0. The reaction was kept at 37 °C for 1 h (intestinal digestion for 1 h,  
35 I1) and 2 h (intestinal digestion for 2 h, I2). The reaction was halted in a 95 °C water  
36 bath for 5 min.

### 37 **2.4 Sodium dodecylsulphate polyacrylamide gel electrophoresis (SDS-PAGE)**

38 Four volumes of digested sample (1 mg/mL) and 1 volume of sample buffer (0.02M  
39 PBS, 1% SDS, 3.5M urea, 0.02% bromophenol blue, 20% glycerol, 1%  $\beta$ -  
40 mercaptoethanol, pH 7.2), were fully mixed and heated at 95 °C for 10 min. Mixed

41 samples (12  $\mu$ L) and protein marker (5  $\mu$ L) were loaded on 4-20% SDS-PAGE precast  
42 gels (GenScript, Nanjing, China). The electrophoresis was performed in running buffer  
43 at a segmented voltage of 80 V for 30 min and 100 V for 80 min (Bio-Rad Laboratories,  
44 Hercules, CA). Gels were stained with Coomassie brilliant blue G-250 (CBB) stain for  
45 15 min on a shaking table. Then, the gels were destained in ultrapure water and captured  
46 by a Molecular Imager GelDoc™ XR + system (Bio-Rad Laboratories, Hercules, CA).

#### 47 **2.11 Histological observation and analysis**

48 More than 20 measurements in mucosal thickness were obtained from each biological  
49 sample at 200  $\times$  magnification. To count the positively stained goblet cells per five  
50 crypts, a total of ten microscopic fields were randomly selected and visualized with a  
51 40  $\times$  lens. The characteristics and content of mucin were characterized by differential  
52 staining. Specifically, blue is acidic mucin, red is neutral mucin, and purple is mixed  
53 mucin. The images were captured by the BX51 light microscope (Olympus, Tokyo,  
54 Japan) and analyzed with the Image-Pro Plus software (Version 6.0, Media  
55 Cybernetics, Bethesda, MD, USA).

#### 56 ***16S rRNA gene sequencing***

57 DNA sequence amplification used universal primers F341 (5'-  
58 CCTAYGGGRBGCASCAG-3') and R806 (5'-GGACTACNNGGGTATCTAAT-3').  
59 The amplicons were purified and quantified, and then sequenced on an Illumina MiSeq  
60 platform. The pair-end library was constructed following the Illumina's genomic DNA  
61 library preparation procedures. PICRUST software package was used to predict  
62 microbial gene function. Pearson's correlation coefficients were estimated to determine

63 the relationships among physiological index, the key gut microbiota and SCFAs.
